# Supplementary material for: Exosomal transfer of microRNA-590-3p between renal tubular epithelial cells after renal ischemia-reperfusion injury regulates autophagy by targeting TRAF6
Source: PubMed Central journal article supplement — Chin Med J (Engl). 2022 Nov 30;135(20):2467–77. doi: 10.1097/CM9.0000000000002377 (PMC9945297; doi:10.1097/cm9.0000000000002377), 2022-11-30
Supplement: cm9-135-2467-s001.pdf [file cm9-135-2467-s001.pdf]

## **Supplement Materials**

Detailed descriptions of the anesthesia process.

Detailed descriptions of the ultracentrifugation process

Supplementary Figure 1. Characterization of sequencing libraries.

Supplementary Figure 2. Bioinformatic analysis of miRNA regulation in young and elderly patients

Supplementary Figure 3. H/R induced autophagy in vitro.

Supplementary Figure 4. Autophagy was significantly induced after H/R in vitro and inhibited the apoptosis of activated HK-2 cells.

Supplementary Table 1. Comparison of intraoperative characteristics between young AKI and elderly AKI groups

Supplementary Table 2. MiRNAs information sheet expressed significantly after preoperative expression in young AKI patients

Supplementary Table 3. MiRNAs information sheet expressed significantly after preoperative expression in elderly AKI patients

Supplementary Table 4: miRNAs that vary significantly before and after surgery in both young and elderly AKI patients have the opposite miRNAs.

### **Detailed descriptions of the anesthesia process**

Anesthesia induction was performed with midazolam (approximately 40 mg kg<sup>-1</sup>), sufentanil (approximately 3 µg kg<sup>-1</sup>), propofol (1.5 mg kg<sup>-1</sup>), and cisatracurium (0.5 mg kg<sup>-1</sup>), and patients were orally intubated after relaxation. All the patients were given a central venous catheter through the right jugular vein. Anesthesia was maintained with sevoflurane (0.2-0.5 minimum alveolar concentration), propofol infusion (2-3 mg kg<sup>-1</sup> h<sup>-1</sup>) and dexmedetomidine (1 µg kg<sup>-1</sup> h<sup>-1</sup>) until CPB began, and volatile anesthetics were used again after CPB was withdrawn. Coronary artery bypass surgery was performed by median sternotomy. The CPB procedure began after heparinization of the arterial intubation of the ascending aorta and the intravenous intubation of the right atrium. Body temperature was maintained between 35°C and 37°C. The effect of heparin was reversed by protamine.

### **Detailed descriptions of the ultracentrifugation process**

To separate the cell-derived exosomes, the supernatants of cell cultures were collected into 50-ml polypropylene tubes and centrifuged at 300 g for 10 min at 4°C to remove free cells. The supernatants were transferred to new centrifuge tubes, centrifuged at 2,000 g for 10 min at 4°C to remove cell debris, and then centrifuged again at 10,000 g for 30 min at 4°C to further remove cell particles. Then, the super clear supernatants were filtered with a 0.22- $\mu$ m filter (Millipore-Sigma, USA) to remove dead cells and particles larger than 200 nm. Next, the exosomes were collected by centrifugation at 100,000 g for 70 min at 4°C. The supernatants were discarded, and the pellets were stored at 4°C for further experiments.

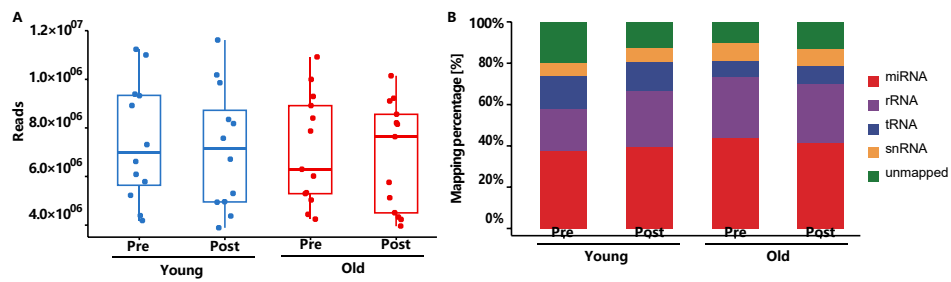

**Supplementary Figure 1:** Characterization of sequencing libraries. (A) Individual library sizes for exosome isolated from pre- and postoperative sera. No significant differences were detected between all time points and groups. (B) Mean relative mapping distributions for various classes of small RNA revealed a strong enrichment of miRNAs in circulating vesicles from all groups. Less than 0.2% of reads carried no adaptor or mapped to snRNA or snoRNA. rRNA, ribosomal RNA; Short, read less than or equal to 15 nt; snRNA, small nuclear RNA; tRNA, transfer RNA.

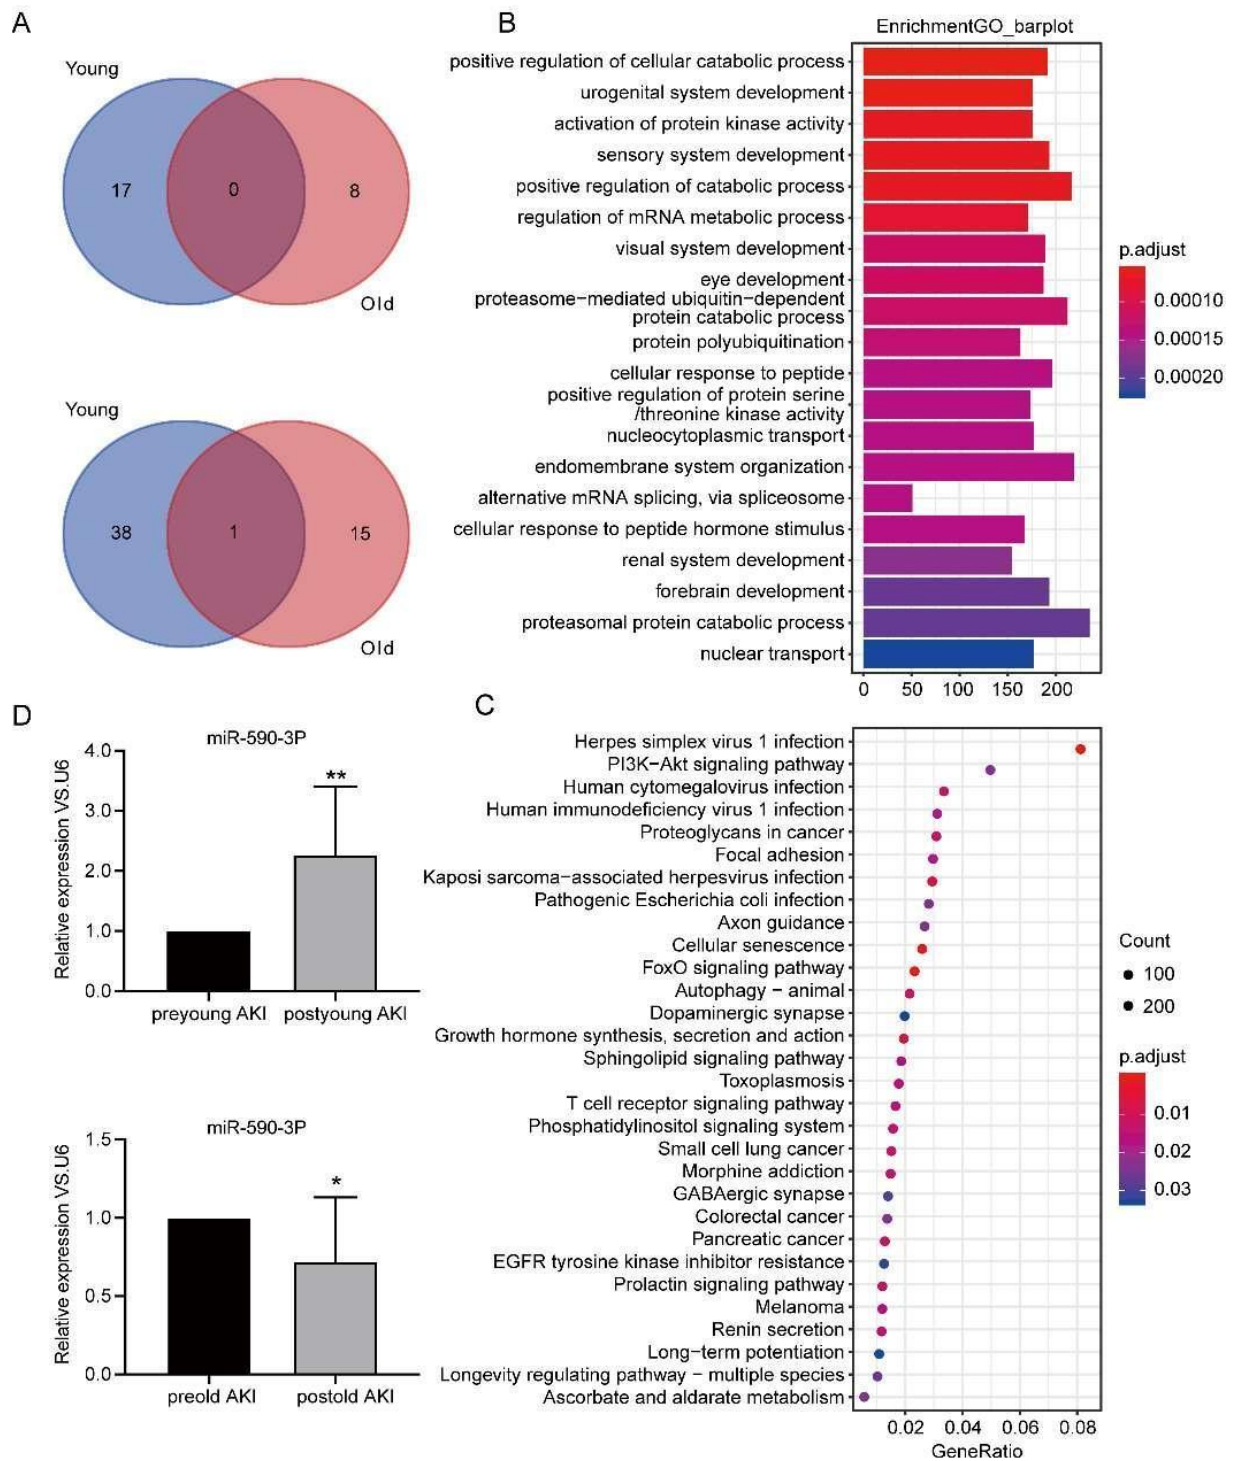

**Supplementary Figure 2:** (A) Differential regulation of miRNAs in young and elderly AKI patients. One miRNA showed significant downregulation after surgery in both groups. (B) GO functional enrichment analysis of target genes of hsa-miR-590-3p. (C) KEGG pathway enrichment analysis of target genes of hsa-miR-590-3p. (D) Hsa-miR-590-3p was expressed before and after surgery in both groups of patients as determined using RT-PCR. \*  $P < 0.05$ . AKI: Acute kidney injury; GO: Gene ontology; miRNA: microRNA.

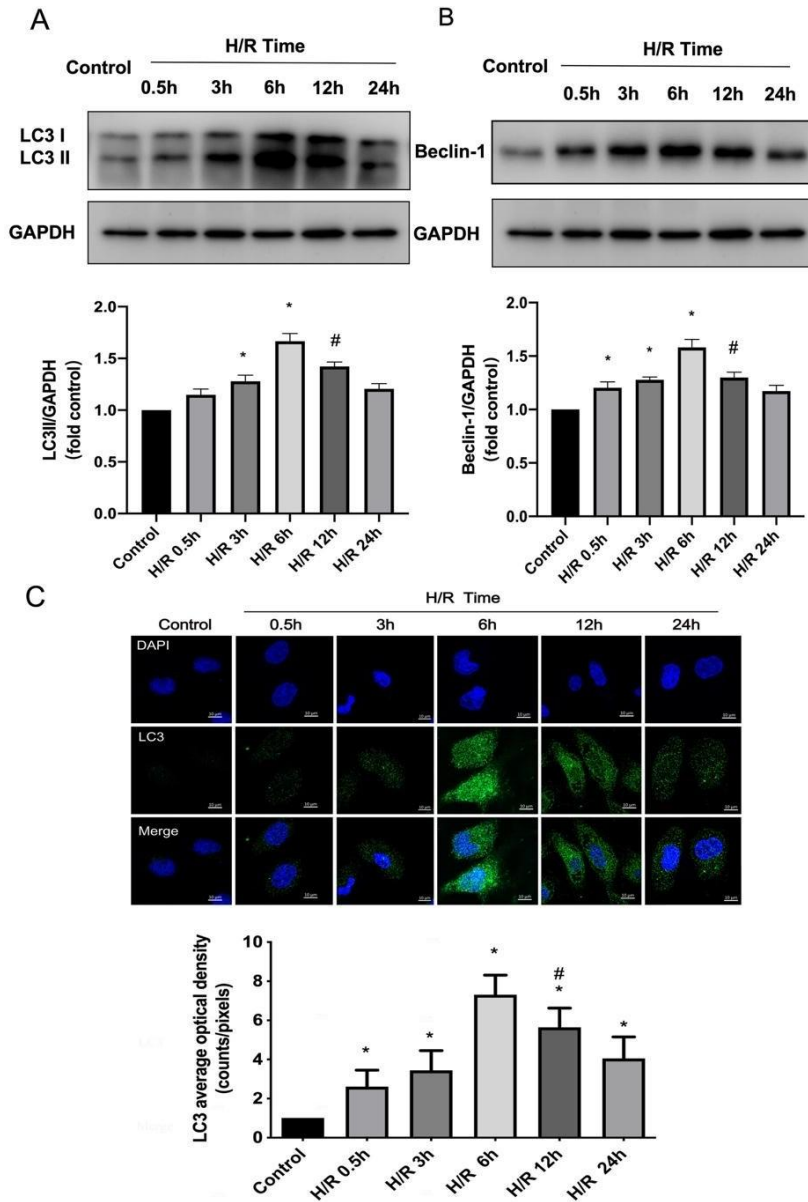

**Supplementary Figure 3:** H/R induced autophagy *in vitro*. (A, B) Representative immunoblot images of LC3, Beclin-1, and GAPDH. (C) Representative images of LC3-positive puncta accumulation were obtained using confocal microscopy. *Scale bar* = 10  $\mu$ m. The ratios of LC3 and Beclin-1 were quantified by densitometry based on immunoblot images from at least three independent experiments. The results are depicted as the ratio of the indicated proteins normalized to GAPDH.  $N = 3$  for immunofluorescence staining. *Bar graphs* represent the mean  $\pm$  SD. \*  $P < 0.05$  vs. the control group; #  $P < 0.05$  vs. the H/R 6 h group. H/R: Hypoxia/reoxygenation.

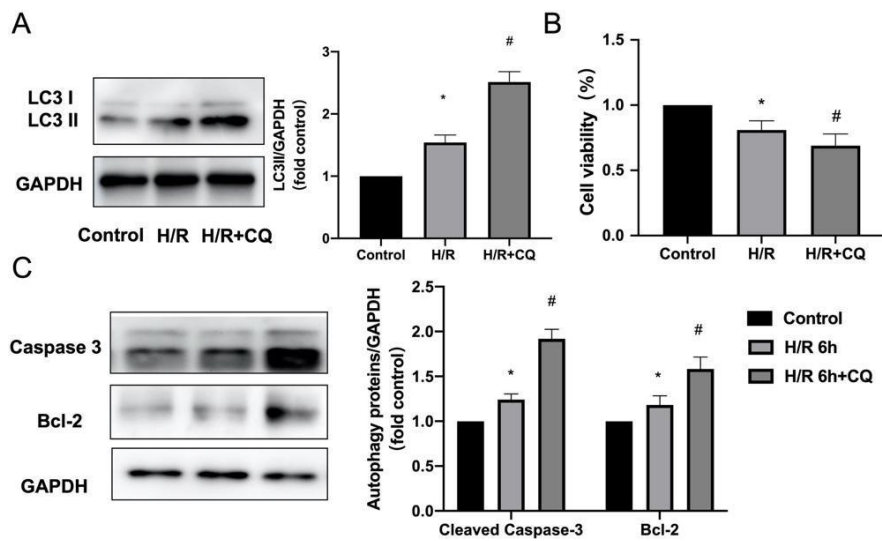

**Supplementary Figure 4:** Autophagy was significantly induced after H/R *in vitro* and inhibited the apoptosis of activated HK-2 cells. (A) Western blot analysis revealed that LC3 expression was upregulated in cultured HK-2 cells after IR injury and was further increased following treatment with CQ. (B) The cell viability in each group was determined by the CCK-8 assay. Cell viability was significantly decreased after H/R, while the cell viability of the H/R + CQ group was decreased significantly compared to that of the H/R group. (C) Western blot analysis revealed increased levels of cleaved caspase 3 and Bcl-2 in the HK-2 cells, but CQ treatment attenuated these increases. The data are expressed as the mean  $\pm$  SD;  $N = 4-5$  for Western blot,  $*P < 0.05$  vs. the control group;  $\#P < 0.05$  vs. the injury group. CCK-8: Cell Counting Kit-8; CQ: Chloroquine; H/R: Hypoxia/reoxygenation.

Supplementary Table 1. Comparison of intraoperative characteristics between young AKI and elderly AKI groups

| Parameters                                 | Young AKI ( <i>n</i> = 12) | Elderly AKI ( <i>n</i> = 13) | Statistics | <i>P</i> value |
|--------------------------------------------|----------------------------|------------------------------|------------|----------------|
| Anesthetics for maintenance during surgery |                            |                              |            |                |
| Propofol, without volatile                 | 3                          | 2                            | –          | 0.645          |
| Volatile, without propofol                 | 1                          | 2                            | –          | >0.999         |
| Volatile, with propofol                    | 8                          | 9                            | –          | >0.999         |
| Operative details                          |                            |                              |            |                |
| Aortic cross-clamp time (min)              | 63.83 ± 9.30               | 65.31 ± 10.77                | –0.365     | 0.718          |
| Circulatory arrest time (min)              | 98.58 ± 12.21              | 101.54 ± 12.56               | –0.596     | 0.557          |
| AKI grade                                  |                            |                              |            |                |
| 1                                          | 8                          | 6                            | –          | 0.529          |
| 2                                          | 2                          | 5                            | –          | 0.378          |
| 3                                          | 2                          | 2                            | –          | >0.999         |

Data are shown as *n* or mean ± standard deviation. AKI: Acute kidney injury.



**Supplementary Table 2.** MiRNAs information sheet expressed significantly after preoperative

expression in young AKI patients

| miRNAs          | Log FC   | <i>P</i> Value | Regulation |
|-----------------|----------|----------------|------------|
| hsa-miR-548ax   | 9.62788  | 0.000583       | up         |
| hsa-miR-4467    | -8.97443 | 0.002708       | down       |
| hsa-miR-423-5p  | -2.88246 | 0.002929       | down       |
| hsa-miR-2110    | -7.90793 | 0.003739       | down       |
| hsa-miR-200c-3p | 8.061612 | 0.003763       | up         |
| hsa-miR-877-5p  | -8.14668 | 0.004863       | down       |
| hsa-miR-449a    | -6.43266 | 0.004948       | down       |
| hsa-miR-4732-5p | -3.53448 | 0.005166       | down       |
| hsa-miR-145-3p  | -4.82447 | 0.007558       | down       |
| hsa-miR-22-3p   | -2.81005 | 0.008149       | down       |
| hsa-miR-431-5p  | 5.574989 | 0.008261       | up         |
| hsa-miR-301a-3p | 5.417528 | 0.009794       | up         |
| hsa-miR-151a-5p | -3.12251 | 0.011036       | down       |
| hsa-miR-374b-5p | 5.706669 | 0.011294       | up         |
| hsa-miR-320a-3p | -2.58511 | 0.012724       | down       |
| hsa-miR-181c-3p | -7.88996 | 0.014655       | down       |
| hsa-miR-504-5p  | 7.770438 | 0.016112       | up         |
| hsa-miR-1290    | -3.52073 | 0.017923       | down       |
| hsa-miR-99a-5p  | -4.96536 | 0.019407       | down       |
| hsa-miR-99b-5p  | -2.74279 | 0.02018        | down       |
| hsa-miR-6815-5p | -7.60393 | 0.02058        | down       |
| hsa-miR-3942-5p | -4.69864 | 0.022237       | down       |
| hsa-miR-542-3p  | 5.168403 | 0.02429        | up         |
| hsa-miR-1843    | -4.37531 | 0.02496        | down       |
| hsa-miR-340-5p  | 3.223518 | 0.025329       | up         |
| hsa-miR-3064-5p | -7.19611 | 0.025974       | down       |

|                 |          |          |      |
|-----------------|----------|----------|------|
| hsa-miR-760     | -7.10158 | 0.02742  | down |
| hsa-miR-6868-3p | -7.08769 | 0.027626 | down |
| hsa-miR-628-3p  | -3.71876 | 0.028131 | down |
| hsa-miR-493-5p  | -7.04784 | 0.028271 | down |
| hsa-miR-369-5p  | 5.699957 | 0.029114 | up   |
| hsa-miR-486-3p  | -4.63078 | 0.029123 | down |
| hsa-miR-125a-3p | -6.97661 | 0.029408 | down |
| hsa-miR-642a-3p | 4.894932 | 0.030321 | up   |
| hsa-miR-1537-3p | 6.759074 | 0.030507 | up   |
| hsa-miR-4755-5p | -6.89682 | 0.030653 | down |
| hsa-miR-10a-3p  | -6.86302 | 0.0313   | down |
| hsa-miR-3940-3p | -6.73498 | 0.033551 | down |
| hsa-miR-30b-5p  | 4.394566 | 0.033941 | up   |
| hsa-miR-629-5p  | -2.29818 | 0.034385 | down |
| hsa-miR-1294    | -3.62892 | 0.035485 | down |
| hsa-miR-423-3p  | -2.36136 | 0.036177 | down |
| hsa-miR-502-3p  | -6.52667 | 0.037438 | down |
| hsa-miR-5187-5p | -6.11492 | 0.037484 | down |
| hsa-miR-582-3p  | -3.63448 | 0.037848 | down |
| hsa-miR-769-3p  | 6.257686 | 0.039935 | up   |
| hsa-miR-542-5p  | 4.69105  | 0.040738 | up   |
| hsa-miR-3913-5p | -6.34138 | 0.041292 | down |
| hsa-miR-590-3p  | 6.19281  | 0.041314 | up   |
| hsa-miR-1268b   | -6.32097 | 0.041851 | down |
| hsa-miR-378a-5p | 6.152746 | 0.042191 | up   |
| hsa-miR-1246    | -2.86045 | 0.043417 | down |
| hsa-miR-3138    | -6.23012 | 0.043757 | down |
| hsa-miR-6805-5p | -4.69032 | 0.046478 | down |
| hsa-miR-206     | 2.87779  | 0.048129 | up   |

---

**Supplementary Table 3.** MiRNAs information sheet expressed significantly after preoperative expression in elderly AKI patients

| miRNAs          | logFC    | <i>P</i> Value | Regulation |
|-----------------|----------|----------------|------------|
| hsa-miR-628-5p  | 7.500165 | 0.002564       | up         |
| hsa-miR-7848-3p | 7.311467 | 0.00375        | up         |
| hsa-miR-758-3p  | 6.460554 | 0.011859       | up         |
| hsa-miR-190b-5p | -6.96385 | 0.016738       | down       |
| hsa-miR-1303    | -6.91101 | 0.016825       | down       |
| hsa-miR-202-3p  | -6.9057  | 0.019599       | down       |
| hsa-miR-1299    | 5.038862 | 0.019643       | up         |
| hsa-miR-3614-5p | 5.745355 | 0.021586       | up         |
| hsa-miR-1291    | -6.42362 | 0.02715        | down       |
| hsa-miR-3143    | -6.56449 | 0.02754        | down       |
| hsa-miR-449b-5p | -6.43986 | 0.030525       | down       |
| hsa-miR-381-3p  | -6.3901  | 0.032402       | down       |
| hsa-miR-204-3p  | -6.33482 | 0.03379        | down       |
| hsa-miR-2115-3p | -6.47949 | 0.033918       | down       |
| hsa-miR-212-5p  | 4.841204 | 0.036273       | up         |
| hsa-miR-2355-3p | -6.15206 | 0.039303       | down       |
| hsa-miR-4755-5p | -6.09492 | 0.041518       | down       |
| hsa-miR-193b-3p | 4.720572 | 0.044261       | up         |
| hsa-miR-3124-5p | -6.15698 | 0.04472        | down       |
| hsa-miR-136-3p  | -6.15444 | 0.04477        | down       |
| hsa-miR-1277-5p | 4.632724 | 0.044795       | up         |
| hsa-miR-4772-5p | -6.08722 | 0.047888       | down       |
| hsa-miR-590-3p  | -6.059   | 0.049          | down       |
| hsa-miR-616-3p  | -5.89256 | 0.049142       | down       |

**Supplementary Table 4: miRNAs that vary significantly before and after surgery in both young and elderly AKI patients have the opposite miRNAs.**

| <b>Group</b> | <b>miRNA</b>   | <b>logFC</b> | <b>P-value</b> | <b>Regulation</b> |
|--------------|----------------|--------------|----------------|-------------------|
| Young AKI    | hsa-miR-590-3p | 6.193        | 0.041          | up                |
| Elderly AKI  | hsa-miR-590-3p | -6.059       | 0.049          | down              |

AKI: Acute kidney injury; FC: Fold change; miRNAs: microRNAs.
